# Supplementary material for: Halogen Bonding in Haspin-Halogenated Tubercidin Complexes: Molecular Dynamics and Quantum Chemical Calculations
Source: MDPI journal article supplement (doi:10.3390/molecules27030706), 2022-01-21
Supplement: s1 [file s1]

# Halogen Bonding in Haspin-Halogenated Tubercidin Complexes: Molecular Dynamics and Quantum Chemical Calculations

Yujing Zhou and Ming Wah Wong \*

Department of Chemistry, National University of Singapore, 3 Science Drive 3,  
Singapore 117543

Email: [chmwmw@nus.edu.sg](mailto:chmwmw@nus.edu.sg)

## Supporting Information

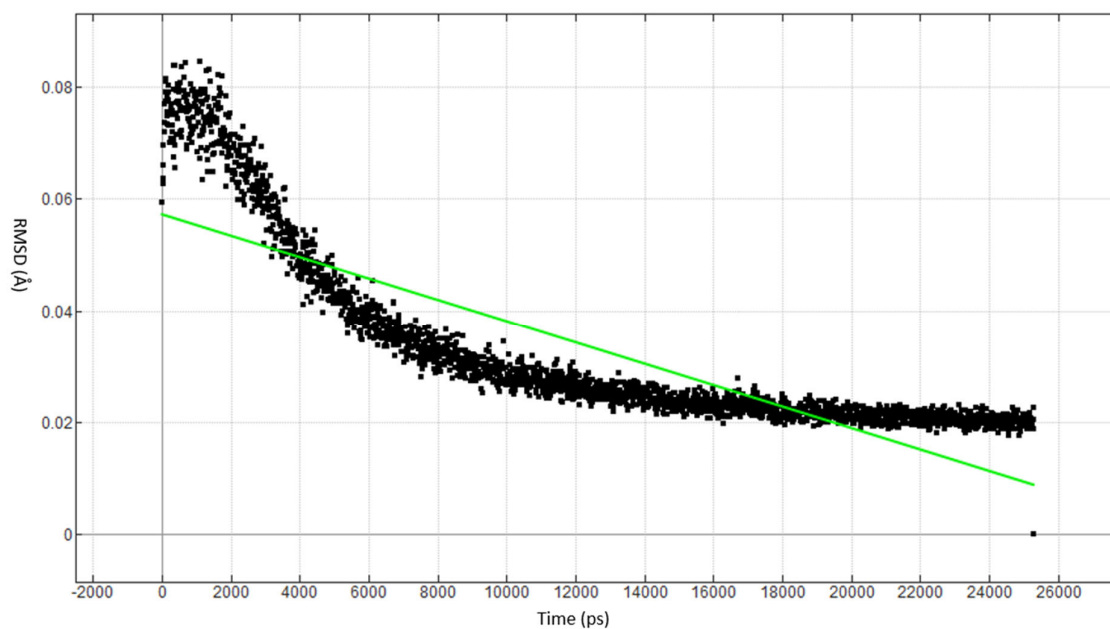

**Figure S1.** Root mean square deviation (RMSD) plot of complex between 5-iTU and Haspin.

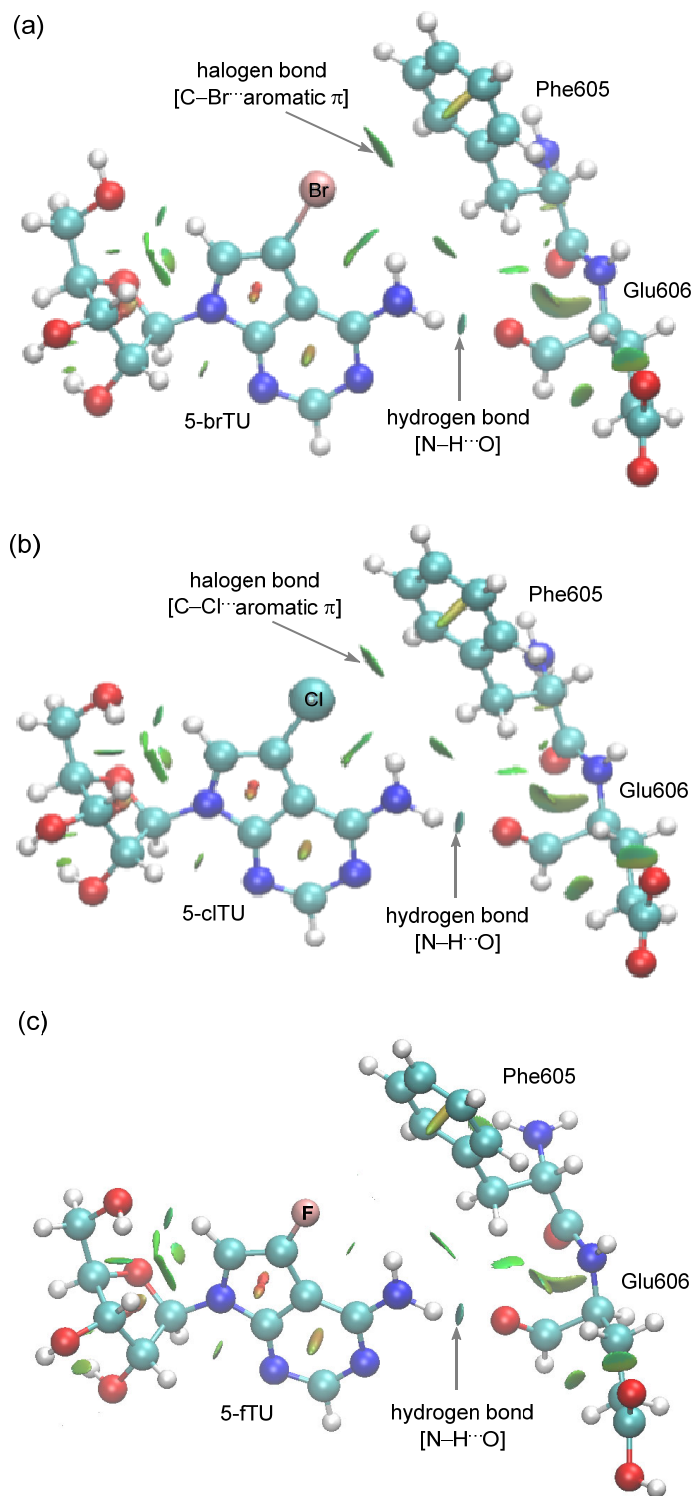

**Figure S2.** NCI isosurface between the tubercidin ligand 5-XTU and Haspin key residues (Phe605-Glu606): (a) 5-brTU, (b) 5-clTU, and (c) 5-ftU.
